# K<sup>+</sup> Channel Regulator KCR1 Suppresses Heart Rhythm by Modulating the Pacemaker Current I<sub>f</sub>

Guido Michels<sup>1</sup>, Fikret Er<sup>1</sup>, Ismail F. Khan<sup>1</sup>, Jeannette Endres-Becker<sup>1</sup>, Mathias C. Brandt<sup>1</sup>, Natig Gassanov<sup>1</sup>, David C. Johns<sup>2</sup>, Uta C. Hoppe<sup>1,3\*</sup>

**1** Department of Internal Medicine III, University of Cologne, Cologne, Germany, **2** Gene Vector Center, The Johns Hopkins University, Baltimore, Maryland, United States of America, **3** Center for Molecular Medicine, University of Cologne (CMMC), Cologne, Germany

Hyperpolarization-activated, cyclic nucleotide sensitive (HCN) channels underlie the pacemaker current I<sub>f</sub>, which plays an essential role in spontaneous cardiac activity. HCN channel subunits (HCN1-4) are believed to be modulated by additional regulatory proteins, which still have to be identified. Using biochemistry, molecularbiology and electrophysiology methods we demonstrate a protein-protein interaction between HCN2 and the K<sup>+</sup> channel regulator protein 1, named KCR1. In coimmunoprecipitation experiments we show that KCR1 and HCN2 proteins are able to associate. Heterologously expressed HCN2 whole-cell current density was significantly decreased by KCR1. KCR1 profoundly suppressed I<sub>HCN2</sub> single-channel activity, indicating a functional interaction between KCR1 and the HCN2 channel subunit. Endogenous KCR1 expression could be detected in adult and neonatal rat ventriculocytes. Adenoviral-mediated overexpression of KCR1 in rat cardiomyocytes (i) reduced I<sub>f</sub> whole-cell currents, (ii) suppressed most single-channel gating parameters, (iii) altered the activation kinetics, (iv) suppressed spontaneous action potential activity, and (v) the beating rate. More importantly, siRNA-based knock-down of endogenous KCR1 increased the native I<sub>f</sub> current size and single-channel activity and accelerated spontaneous beating rate, supporting an inhibitory action of endogenous KCR1 on native I<sub>f</sub>. Our observations demonstrate for the first time that KCR1 modulates I<sub>HCN2</sub>/I<sub>f</sub> channel gating and indicate that KCR1 serves as a regulator of cardiac automaticity.

Citation: Michels G, Er F, Khan IF, Endres-Becker J, Brandt MC, et al (2008) K<sup>+</sup> Channel Regulator KCR1 Suppresses Heart Rhythm by Modulating the Pacemaker Current I<sub>f</sub>. PLoS ONE 3(1): e1511. doi:10.1371/journal.pone.0001511

## INTRODUCTION

Hyperpolarization-activated cation channels are found in a variety of cardiac cells and neurons [1–3]. These channels activate in response to hyperpolarization to generate an inward current termed I<sub>f</sub> (“funny”) in cardiac cells, I<sub>h</sub> (“hyperpolarization”-activated) in neurons, or I<sub>q</sub> (“queer”). I<sub>f</sub> has been proposed to contribute to pacemaker depolarization which generates rhythmic activity in spontaneously active cardiac cells [4,5] and neurons [6,7]. A family of four homologous hyperpolarization-activated, cyclic nucleotide-gated ion channel subunits (HCN1–4) have been identified [8–11]. In heterologous expression all HCN channels give rise to a hyperpolarization-activated inward current with similar but not identical characteristics compared to native I<sub>f</sub> [8,9,12]. These observations suggest that HCN channel function is likely to be modulated by regulatory proteins and β-subunits in myocardial tissue.

The K<sup>+</sup> channel regulator 1 (KCR1), originally cloned from rat cerebellum, is a plasma membrane-associated protein with 12 putative transmembrane regions which is also expressed in rat cerebrum, and in rat and human heart [13,14]. The KCR1 protein can associate with rat ether-à-go-go (EAG) and human ether-à-go-go related (HERG) channel subunits [13–15]. Given the structural similarity and sequence analogy of HERG and HCN genes, we speculated that KCR1 might also interact with HCN channel subunits [8,9,12]. Therefore, we evaluated whether KCR1 and HCN2 proteins can associate. Secondly, we aimed to determine any possible functional modulation of I<sub>HCN2</sub> and native I<sub>f</sub> current characteristics by KCR1 in electrophysiological studies. Our results show that KCR1 and HCN2 proteins interact and demonstrate that KCR1 profoundly alters I<sub>HCN2</sub> and I<sub>f</sub> gating properties. Furthermore, KCR1 suppressed spontaneous rhythmicity in cardiocytes. Thus, our observations indicate that KCR1 serves as a regulatory protein of native I<sub>f</sub>.

## RESULTS

### KCR1 and HCN2 associate in a protein complex

To determine whether HCN and KCR1 gene products can form a protein complex, we prepared protein extracts from CHO cells cotransfected with KCR1 cDNA incorporating triple FLAG tags at the 5' end (pCFLAG<sup>3</sup>-KCR1) and HCN2 cDNA. Control cells were transfected with pCFLAG<sup>3</sup>-KCR1 alone or cotransfected with HCN2 and the empty FLAG-epitope containing vector. Input lysates were assayed in Western blots using an anti-HCN2 antibody to show successful production and detection of the HCN2 protein (Figure 1A). In addition, cell lysates were immunoprecipitated with anti-FLAG-Sepharose and then blotted using the anti-HCN2 antibody. Indeed, a band with the expected molecular mass of HCN2 was detected by the anti-HCN2 antibody in cells cotransfected with HCN2 and pCFLAG<sup>3</sup>-

.....  
**Academic Editor:** Huibert Mansvelder, Vrije Universiteit Amsterdam, Netherlands

**Received** July 30, 2007; **Accepted** December 22, 2007; **Published** January 30, 2008

**Copyright:** © 2008 Michels et al. This is an open-access article distributed under the terms of the Creative Commons Attribution License, which permits unrestricted use, distribution, and reproduction in any medium, provided the original author and source are credited.

**Funding:** This study was supported by a grant from the Deutsche Forschungsgemeinschaft (Ho 2146/3-1), by Köln Fortune, and by the Marga und Walter Boll-Stiftung. Funders were not involved in the design and conduct of the study, in the collection, analysis, and interpretation of the data, and in the preparation, review, or approval of the manuscript.

**Competing Interests:** The authors have declared that no competing interests exist.

\* **To whom correspondence should be addressed.** E-mail: uta.hoppe@uni-koeln.de

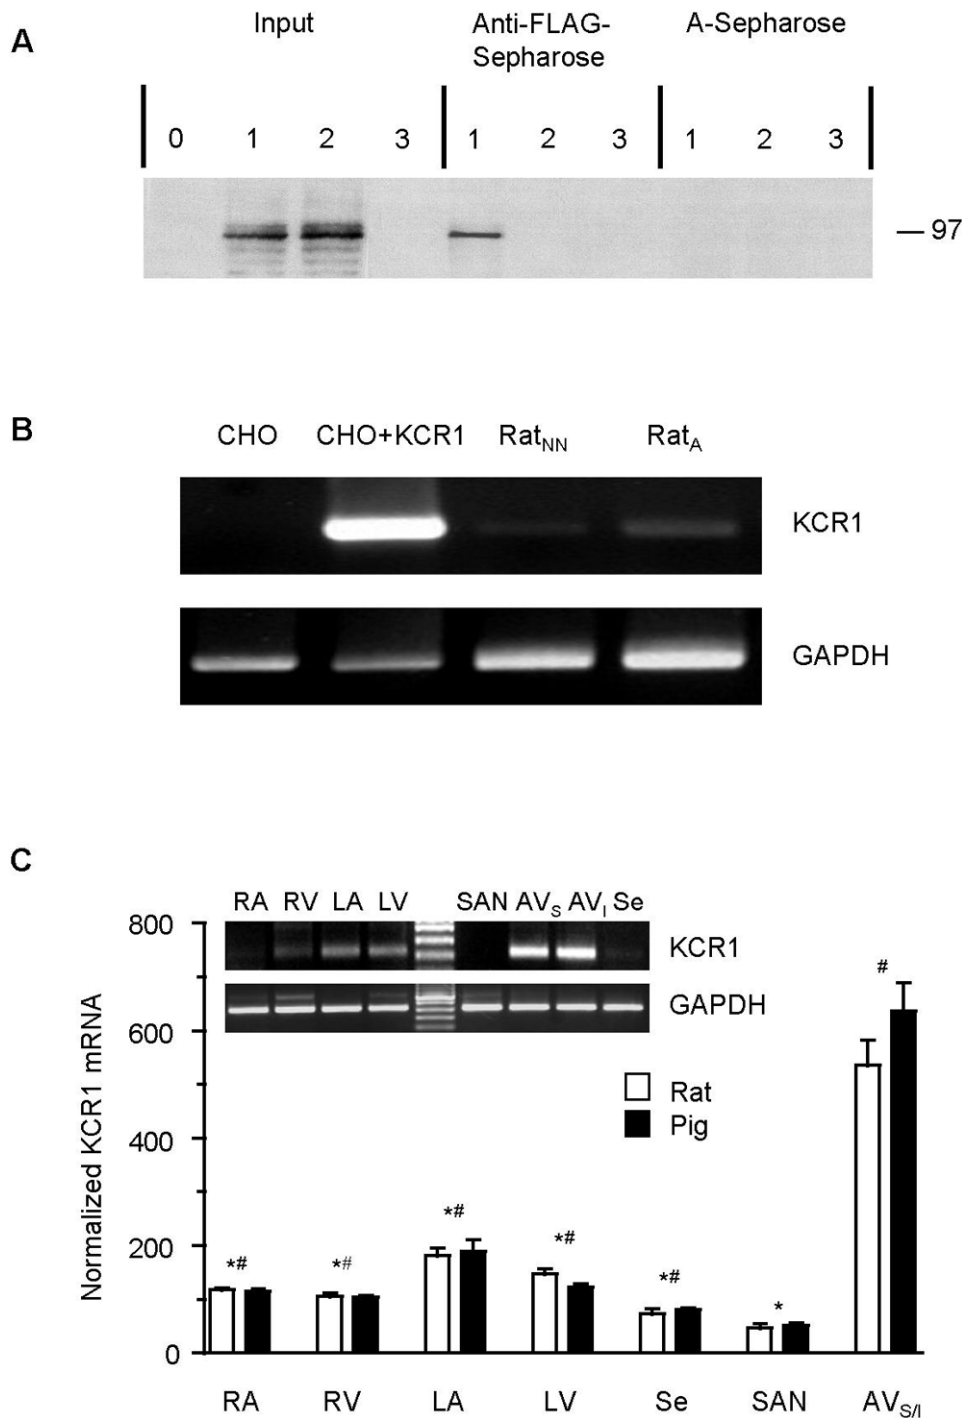

**Figure 1. Analysis of protein interaction between HCN2 and KCR1 and expression of KCR1 in various cell types.** (A) KCR1 and HCN2 can associate in protein complexes. Coimmunoprecipitation of HCN2 and KCR1 from mammalian cell extracts. Protein extracts from cells transfected with pCFLAG<sup>3</sup>-KCR1 (lane 0), HCN2 plus pCFLAG<sup>3</sup>-KCR1 (lanes 1), HCN2 plus p3xFLAG-CMV (lanes 2) or non-transfected cells (lanes 3) assayed by Western blot using anti-HCN2 antibody. Input: input lysates were blotted to show that HCN2 protein was successfully produced and detected. Anti-FLAG-Sepharose: 700  $\mu$ g of total lysate immunoprecipitated with anti-FLAG-Sepharose shows that HCN2 and KCR1 (pCFLAG<sup>3</sup>-KCR1) can be coimmunoprecipitated (lane 1). A-Sepharose: mock immunoprecipitation using protein A-Sepharose beads unlinked to FLAG-antibody to exclude any unspecific antibody binding. (B) KCR1 message (218 bp) can be detected in all cell types tested, except for non-transfected CHO cells (upper panel). Representative electrophoresis gel illustrating results obtained in single-cell RT-PCR experiments (as described in Methods) with three different cell types. CHO: Non-transfected Chinese hamster ovary cells; CHO+KCR1: CHO cells transfected with KCR1 cDNA; Rat<sub>NN</sub>: Neonatal rat cardiomyocytes; Rat<sub>A</sub>: Adult rat cardiomyocytes. GAPDH mRNA (318 bp) was used as a control and is found in all cell types tested, including non-transfected, KCR1-negative CHO cells (lower panel). Negative controls did not include RNA or reverse transcriptase and gave no amplicons (not shown). (C) Regional differences in expression of KCR1 in adult rat and pig heart. KCR1 mRNA levels determined by quantitative real-time PCR (qPCR; n=3–4). RA=right atrium, RV=right ventricular free wall, LA=left atrium, LV=left ventricular free wall, Se=septum, SAN=sinoatrial node, AV=atrioventricular node. Values are mean $\pm$ SEM. \*p<0.05 vs. AV node, #p<0.05 vs. SAN. Upper panel: Representative electrophoresis gel obtained from qPCR products of different cardiac regions (the AV-node region was divided in: AV<sub>S</sub>=superior part and AV<sub>I</sub>=inferior part), samples were loaded and normalized to GAPDH. doi:10.1371/journal.pone.0001511.g001

KCR1, whereas it could not be coimmunoprecipitated from extracts containing pCFLAG<sup>3</sup>-KCR1 alone or HCN2 and the empty FLAG-epitope containing vector (Figure 1A). These results indicate that HCN2 and KCR1 associate in protein complexes in mammalian cells, while excluding any unspecific detection of KCR1 by the anti-HCN2 antibody and any unspecific coimmunoprecipitation of the FLAG-epitope and HCN2. In addition, unspecific coimmunoprecipitation by the anti-FLAG-Sepharose could be excluded by mock immunoprecipitation with normal A-Sepharose (Figure 1A).

### KCR1 reduces HCN2 current size and profoundly modulates HCN2 channel gating

To evaluate a possible functional interaction of HCN2 and KCR1, the effect of KCR1 on  $I_{HCN2}$  was analysed. Whole-cell  $I_{HCN2}$  currents were recorded from CHO cells transfected with HCN2 (0.25  $\mu$ g/well) alone or together with KCR1 (ratio 1:1, 1:2 or 1:3; total cDNA amount adjusted to 1  $\mu$ g/well with the unrelated channel subunit Kv1.3A<sub>Y</sub>A in all experiments). RT-PCR revealed no detectable KCR1 in non-transfected CHO cells (Figure 1B). Representative current recordings (Figure 2A) and mean current densities (Figure 2B) show that  $I_{HCN2}$  ( $79.6 \pm 13.9$  pA/pF at  $-130$  mV,  $n = 9$ ) was significantly decreased by KCR1 ( $15.8 \pm 10.4$  pA/pF, ratio 1:1,  $n = 14$ ;  $3.6 \pm 2.1$  pA/pF, ratio 1:2,  $n = 10$ ;  $2.5 \pm 0.9$  pA/pF, ratio 1:3,  $n = 17$ ;  $p < 0.001$ ). Moreover, KCR1 significantly shifted half-maximal activation of  $I_{HCN2}$  ( $-102.0 \pm$

$2.1$  mV) to more negative potentials ( $-109.8 \pm 2.0$  mV for HCN2+KCR1, ratio 1:1;  $p = 0.048$ ;  $n = 12$ ).

To further confirm a functional modulation of HCN2 channel properties by KCR1 additional single-channel recordings were performed. Available data about HCN single-channel properties vary depending on cell-type and recording technique [16–20]. While we previously already showed characteristic stimulation of single HCN2 channels by forskolin [16], we now further proved that the channel openings in our experiments were produced by HCN channels demonstrating (i) a time- and voltage-dependent kinetic similar to macroscopic  $I_{HCN}/I_f$  current from HCN2 multi-channel recordings, which allows in contrast to “pure” one-channel recording cooperative HCN channel gating (Figure 3A), (ii) a HCN2 single-channel conductance of these multi-channel patches ( $24.0 \pm 4.62$  pS,  $n = 3$ ) comparable to our cell-attached recordings (considering the symmetrical  $K^+$ -solution in inside-out recordings) (Figure 3A), (iii) a typical increase of the open probability upon cAMP application in inside-out recordings (control:  $24.7 \pm 11.1\%$  vs. Br-cAMP 1 mM:  $51.0 \pm 14.1\%$ ,  $n = 4$ ,  $p < 0.05$ ) (Figure 3B and 3C), and (iv) a reduction of HCN2 open probability by the specific  $I_f$  inhibitor ivabradine (50  $\mu$ M) ( $25.8 \pm 7.07\%$  vs.  $6.08 \pm 3.45\%$ ,  $n = 4$ ,  $p < 0.05$ ) (Figure 3B and 3C).

Single-channel characteristics of cells cotransfected with HCN2 and KCR1 were distinct from cells expressing HCN2 alone. KCR1 profoundly reduced single-channel activity of  $I_{HCN2}$  (Figure 4A; Table 1). Moreover, KCR1 caused a hyperpolarization shift of the voltage of half-maximal  $I_{HCN2}$  activation ( $V_{0.5}$  for  $I_{HCN2}$  and

A

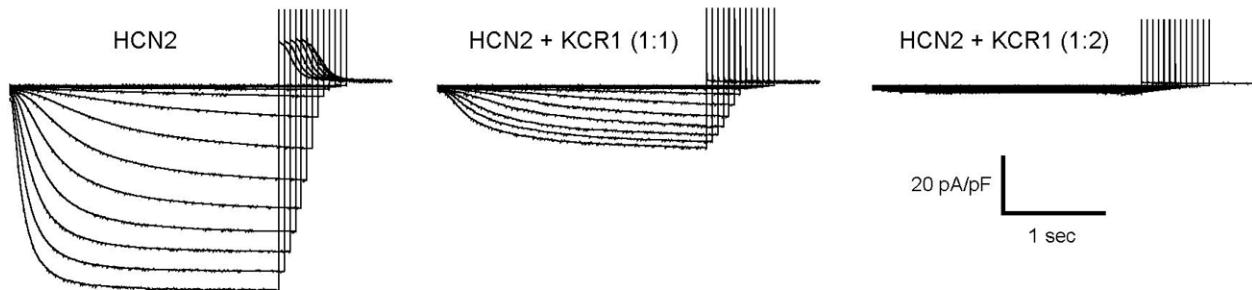

B

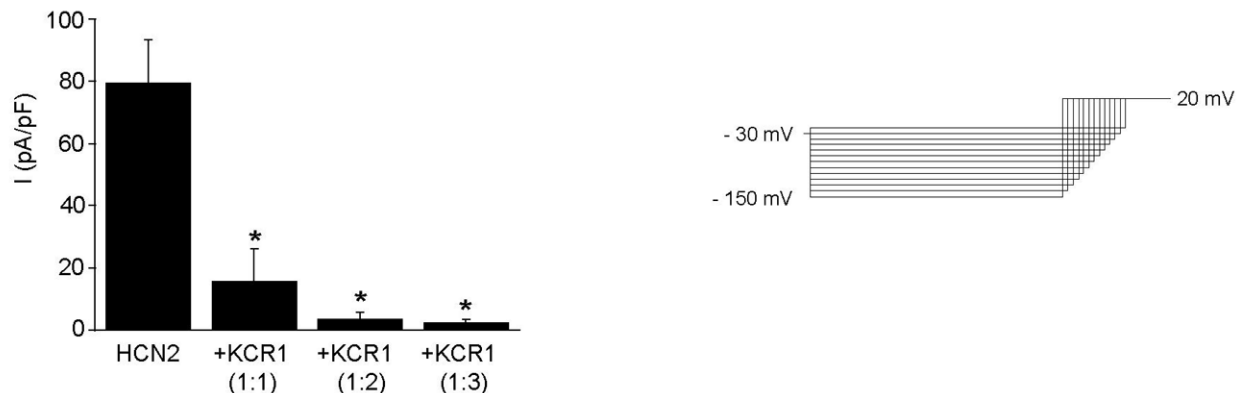

**Figure 2. KCR1 suppresses recombinant  $I_{HCN2}$  current density.** (A) Representative HCN2 whole-cell currents in absence and presence of KCR1. (B) Mean current densities of heterologously expressed HCN2 alone or together with KCR1 demonstrate that KCR1 significantly ( $*, p < 0.001$ ) reduced current density of recombinant  $I_{HCN2}$ . For data see text. doi:10.1371/journal.pone.0001511.g002

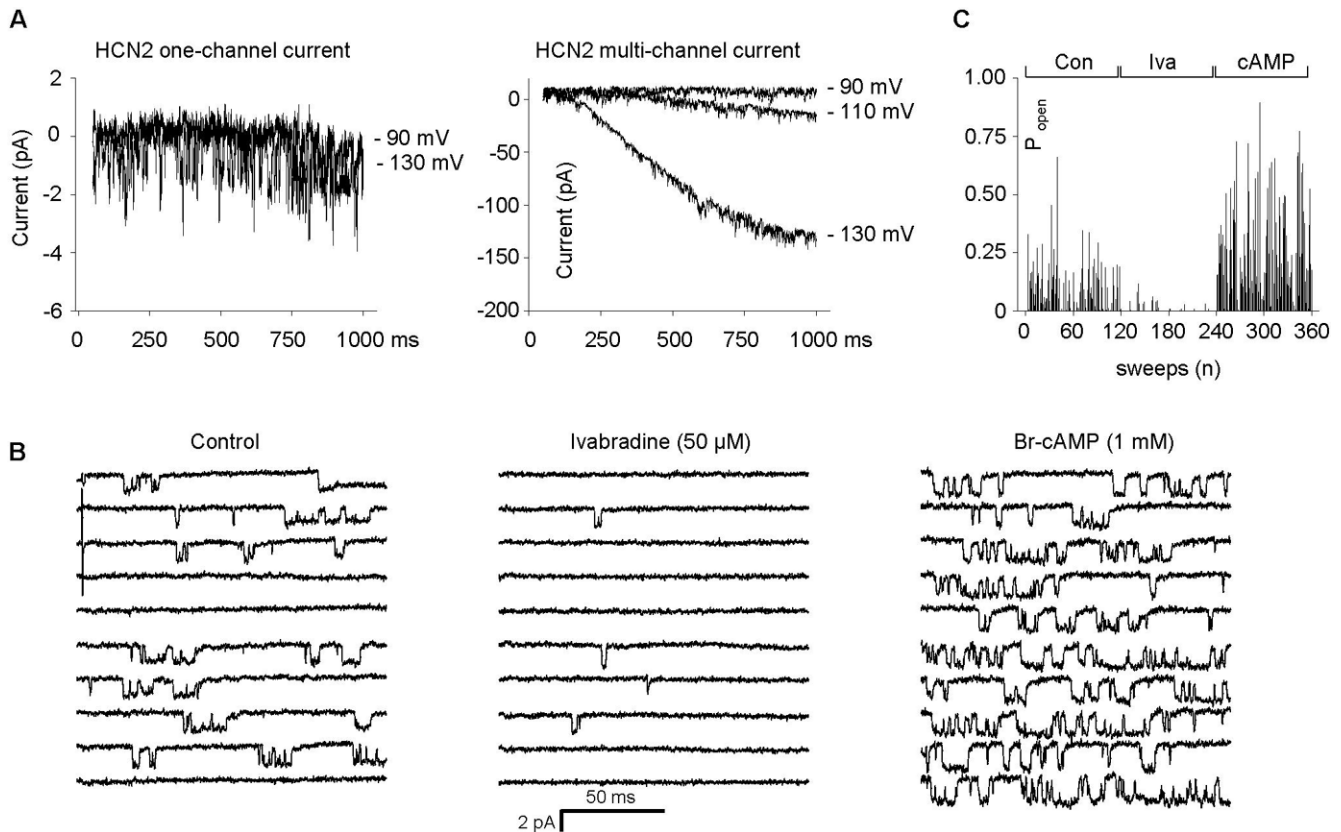

**Figure 3. Electrophysiological and pharmacological properties of  $I_{HCN2}/I_f$  on single-channel level from inside-out recordings.** (A) Representative HCN2 single-channel currents (sampling frequency: 5 kHz, corner frequency: 1 kHz) of inside-out recordings from one- and multi-channel ( $n \sim 50$  channels) patches at different test-potentials ( $-90$  to  $-130$  mV). (B) Pharmacological characteristics of HCN2 single-channels (test potential:  $-90$  mV, holding potential:  $-35$  mV). Ivabradine ( $50 \mu\text{M}$ ) blocks HCN2 single-channel current during repetitive activation/deactivation steps ( $-90$  mV,  $150$  ms/ $+10$  mV,  $600$  ms). The observations that ivabradine significantly reduced the open probability ( $25.8 \pm 7.07\%$  vs.  $6.08 \pm 3.45\%$ ,  $n = 4$ ,  $p < 0.05$ ), the mean open time ( $1.03 \pm 0.12$  ms vs.  $0.61 \pm 0.16$  ms,  $n = 4$ ,  $p < 0.05$ ) and the availability ( $75.9 \pm 10.1\%$  vs.  $25.3 \pm 6.98\%$ ,  $n = 4$ ,  $p < 0.05$ ) suggests an open-channel blockade by a fast and a slow gating mechanism. cAMP induced an increase of the channel activity (for data, see text). The data were sampled at  $10$  kHz and filtered at  $2$  kHz. (C) Effect of ivabradine (Iva) and cAMP on single-channel activity. Open probability ( $P_{\text{open}}$ ) decreased after ivabradine ( $50 \mu\text{M}$ ) and increased after cAMP ( $1$  mM) application, respectively. Data recorded as in Figure 3B. doi:10.1371/journal.pone.0001511.g003

$I_{HCN2+KCR1(1:2)}$  was  $-58.5 \pm 4.8$  mV,  $n = 6$ , vs.  $-89.7 \pm 4.9$  mV,  $n = 5$ ,  $p = 0.001$ , with the slope factor  $k$  being unchanged:  $-15.8 \pm 3.0$  mV and  $-12.4 \pm 2.7$  mV, respectively; Figure 4B).

We recently revealed an allosteric multi-state gating model comprising at least four open and five closed states of single HCN2 channel recordings [16,21]. In the present study KCR1 altered HCN2 channel open kinetics to only three open states (HCN2- $\tau_{\text{open}}$  values [ms]:  $0.13$  [47.5%],  $0.86$  [33.5%],  $2.24$  [18.5%],  $5.93$  [0.5%] ( $n = 8$ ) vs. HCN2+KCR1 (1:1)- $\tau_{\text{open}}$  values [ms]:  $0.13$  [54.7%],  $0.87$  [38.5%],  $2.72$  [6.8%] ( $n = 4$ ) and HCN2+KCR1 (1:2)- $\tau_{\text{open}}$  values [ms]:  $0.13$  [77%],  $0.69$  [21.9%],  $2.36$  [1.1%] ( $n = 5$ )), while not significantly affecting the five closed states (HCN2- $\tau_{\text{closed}}$  values [ms]:  $0.15$  [55.7%],  $0.90$  [28.4%],  $3.36$  [5.5%],  $5.52$  [4.1%],  $21.0$  [6.3%] ( $n = 5$ ) vs. HCN2+KCR1 (1:1)- $\tau_{\text{closed}}$  values [ms]:  $0.12$  [64.9%],  $0.55$  [18.9%],  $0.97$  [12%],  $2.96$  [3.8%],  $27.0$  [0.4%] ( $n = 4$ ) and HCN2+KCR1 (1:2)- $\tau_{\text{closed}}$  values [ms]:  $0.14$  [76.3%],  $0.83$  [16.8%],  $1.78$  [3.1%],  $7.80$  [1.3%],  $37.92$  [2.5%] ( $n = 4$ ) (Figure 4C and 4D).

### KCR1 is highly expressed in the atrioventricular-node

While functional interaction of HCN and KCR1 gene products in heterologous mammalian systems is interesting, it is even more

important whether KCR1 is present in cardiac tissue and might also modulate native  $I_f$ . To clarify this situation we chose neonatal and adult rat ventriculocytes. To omit any interference of non-cardiac cells, we performed reverse transcriptase PCR analysis of single neonatal and adult rat ventricular myocytes. Indeed, in both cell types the expected band could be detected (Figure 1B), demonstrating endogenous expression of KCR1 in native cardiac cells.

To analyze regional expression of KCR1, we determined KCR1 mRNA levels of freshly dissected samples from different parts of adult rat and pig hearts by quantitative real-time PCR. In both species we consistently obtained highest KCR1 expression in the atrioventricular node (rat:  $536 \pm 48\%$ ,  $n = 3$ ; pig:  $637 \pm 52\%$ ,  $n = 3$ ;  $p < 0.05$  vs. all other regions) and lowest levels of KCR1 in the sinus node (rat:  $46.3 \pm 8.10\%$ ,  $n = 3$ ; pig:  $52.7 \pm 4.98\%$ ,  $n = 3$ ;  $p < 0.05$  vs. all other regions) (Figure 1C).

### KCR1 overexpression suppresses current density and single-channel activity of native $I_f$

Considering our results in heterologous expression, overexpression of a construct carrying KCR1 should reduce  $I_f$  current density in myocardium if HCN and KCR1 also interact in native tissue. In neonatal ventriculocytes  $I_f$  density was indeed markedly reduced from  $4.7 \pm 0.3$  pA/pF ( $n = 14$ ) in control cells infected with

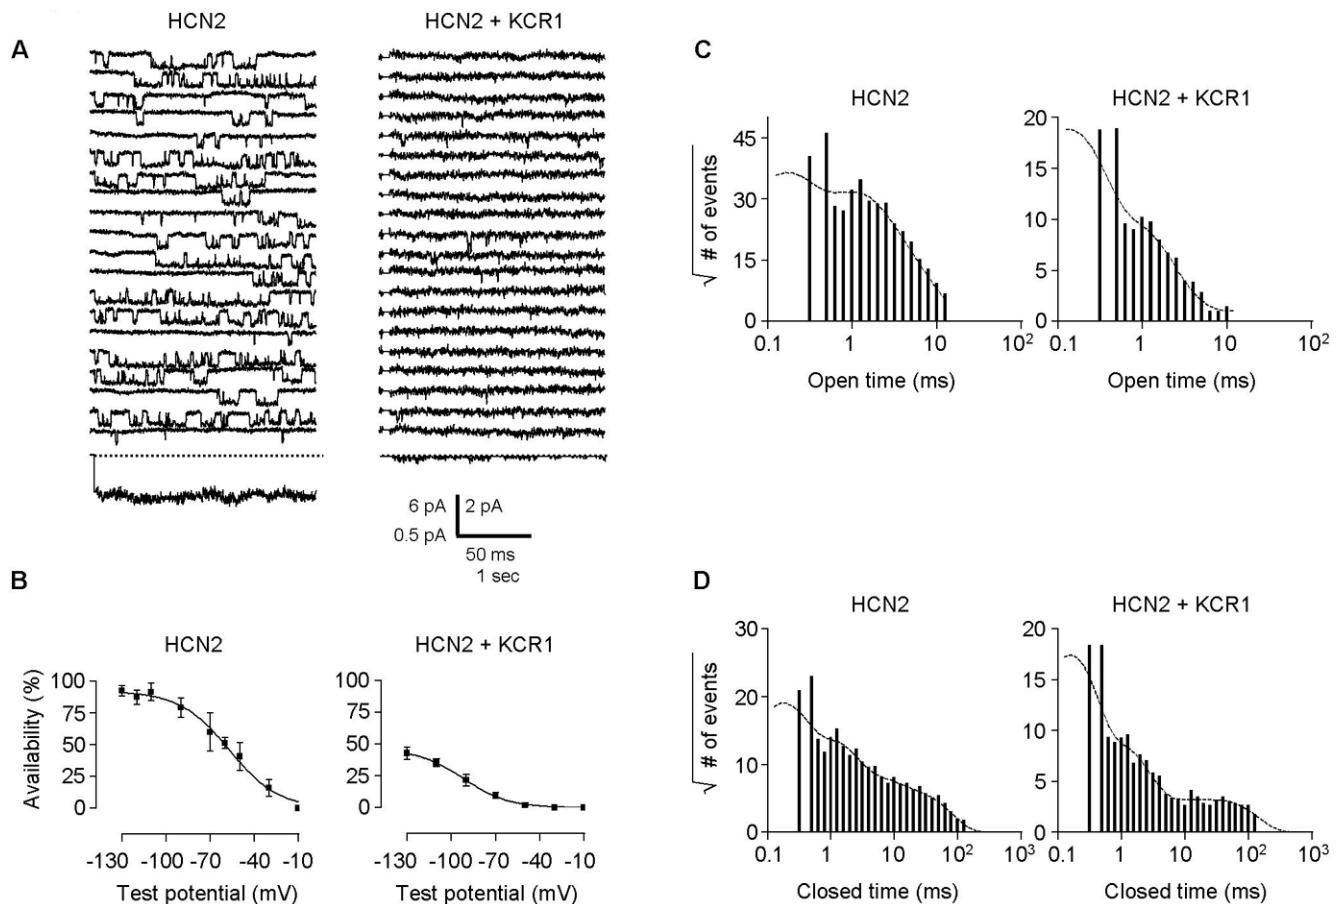

**Figure 4. Effect of KCR1 on single recombinant HCN2 channel gating in one-channel patches.** (A) Comparison of single recombinant HCN2 channels transfected in CHO cells alone (left) and with KCR1 (right). Middle, 20 consecutive single traces of each channel without and with KCR1. Single channels were hyperpolarized at continuous pulse mode for a total duration of 3 s ( $20 \times 150$  ms sweeps), with a holding potential of  $-35$  mV and a test potential of  $-90$  mV. Bottom, ensemble average current of one consecutive sweep of 3 s pulse duration. Scale bars, 50 ms, 6 pA (unitary current traces) for HCN2 alone (left) and 2 pA when co-transfected with KCR1 (right), or 1 s, 0.5 pA (ensemble average current) for HCN2 and HCN2+KCR1. (B) KCR1 significantly shifted  $I_{HCN2}$  activation to more negative potentials. Channel activation was measured by the parameter availability, plotted against the test potential and then determined by using the Boltzmann function. For data see text. (C) Open-time histograms: KCR1 reduced the number of HCN2 open states. Number of open events (square root) were plotted against the logarithmically binned open time durations for HCN2 alone and HCN2+KCR1 (pooled one- and multi [ $n \leq 3$ ]-channel experiments). (D) Closed-time histograms: KCR1 did not affect the number of HCN2 closed states. Number of closed events (square root) were plotted against the logarithmically binned closed time durations for HCN2 alone and HCN2+KCR1 (pooled one-channel experiments only). doi:10.1371/journal.pone.0001511.g004

adenoviral vectors expressing EGFP alone to  $0.9 \pm 0.1$  pA/pF ( $n=9$ ) in KCR1-infected cells when measured at  $-130$  mV ( $p < 0.001$ ) (Figure 5A, 5B and 5D). Similarly,  $I_f$  current size in adult rat ventricular myocytes was significantly suppressed from  $3.3 \pm 0.5$  pA/pF ( $n=11$ ) in controls to  $0.38 \pm 0.08$  pA/pF (at  $-130$  mV;  $n=10$ ) in KCR1-infected myocytes ( $p < 0.001$ ).

Direct modulation of  $I_f$  by KCR1 overexpression was further analysed in single-channel recordings. Notably, single-channel properties of native  $I_f$  in control cells more closely resembled those of heterologously expressed HCN2+KCR1 than of  $I_{HCN2}$  alone (Figure 6A, Table 2), indicating a possible modulation of HCN subunits by endogenous KCR1 in native cells. KCR1 further suppressed single-channel availability, open probability, and single-channel amplitude and conductance of native  $I_f$  (Figure 6A and 7A; Table 2), and shifted the voltage of half-maximal activation to more negative values (adult ventricular myocytes: from  $-66.3 \pm 4.5$  mV,  $n=5$ , to  $-95.8 \pm 3.8$  mV,  $n=7$ ;  $p < 0.001$ , Figure 6B; neonatal ventricular myocytes: from  $-56.4 \pm 1.3$  mV,  $n=12$ , to  $-81.3 \pm 3.2$  mV,  $n=10$ ;  $p < 0.0001$ , Figure 7B), without

significantly affecting the slope factor  $k$  for adult (control:  $-11.9 \pm 2.1$  mV, KCR1:  $-17.8 \pm 3.1$  mV), and neonatal ventricular myocytes (control:  $-12.1 \pm 3.9$  mV, KCR1:  $-16.7 \pm 4.8$  mV). These data indicate that KCR1 modulates single-channel behavior of  $I_f$  in cardiac tissue.

While KCR1 reduced the number of HCN2 open states from four to three in the heterologous expression system (CHO cells), in which no endogenous KCR1 was detectable, KCR1 had no effect on gating kinetics of native  $I_f$  in cardiomyocytes. In neonatal ventricular myocytes we detected only three open and three closed states ( $I_f\text{-}\tau_{\text{open}}$  values [ms]: 0.26 [58.9%], 0.87 [32.8%], 4.54 [8.3%] ( $n=12$ ) vs.  $I_f\text{+KCR1-}\tau_{\text{open}}$  values [ms]: 0.25 [47.8%], 1.22 [43.1%], 5.56 [9.1%] ( $n=10$ );  $I_f\text{-}\tau_{\text{closed}}$  values [ms]: 0.18 [57.5%], 1.57 [33.6%], 12.7 [8.9%] ( $n=5$ ) vs.  $I_f\text{+KCR1-}\tau_{\text{closed}}$  values [ms]: 0.15 [45.1%], 1.13 [37.3%], 16.5 [17.6%] ( $n=6$ ), Figure 7C and 7D), whereas in adult ventricular myocytes we observed two more closed state ( $I_f\text{-}\tau_{\text{open}}$  values [ms]: 0.23, 0.94, 4.64 ( $n=7$ ) vs.  $I_f\text{+KCR1-}\tau_{\text{open}}$  values [ms]: 0.18, 0.99, 4.59 ( $n=6$ );  $I_f\text{-}\tau_{\text{closed}}$  values [ms]: 0.16 [60.2%], 0.99 [14.7%], 1.21 [17.6%], 5.47

**Table 1.** Gating of single recombinant HCN2 and KCR1-cotransfected  $I_{HCN2}$ 

| Parameter               | HCN2 control            | HCN2+KCR1 (1:1) | HCN2+KCR1 (1:2) |
|-------------------------|-------------------------|-----------------|-----------------|
| Open probability (%)    | 32.6±8.79               | 23.4±13.14      | 0.99±0.32*      |
| Availability (%)        | 78.5±6.10               | 54.6±20.48      | 22.9±4.01*      |
| Mean open time (ms)     | 1.15±0.15               | 0.76±0.16       | 0.44±0.06*      |
| Mean closed time (ms)   | 2.94±0.45               | 1.23±0.44*      | 2.78±0.61       |
| Mean first latency (ms) | 37.2±6.27               | 38.0±17.14      | 42.9±5.94       |
| Amplitude (pA)          | -2.16±0.15              | -0.86±0.06*     | -0.68±0.01*     |
| Conductance (pS)        | 34.6±2.43 <sup>1)</sup> | 12.3±1.44*      | 8.39±0.63*      |
| $I_{peak}$ (fA)         | 809±170                 | 398±204         | 43±14*          |
| number of experiments   | 10 (6)                  | 4 (4)           | 9 (4)           |

Single-channel parameters of HCN2 (control) and KCR1-cotransfected  $I_{HCN2}$  channels in CHO-cells. Holding potential -35 mV, test potential -90 mV.  $I_{peak}$  was measured from ensemble average currents. For closed time and latency analysis, only experiments containing just one detected open level were used for calculation. Numbers of experiments given in parentheses indicate number of experiments with only one channel in the patch. Pooled data are presented as mean±SEM.

\* $p < 0.05$  vs. control.

<sup>1)</sup>in this case  $n = 12$  experiments were taken for conductance calculation.

doi:10.1371/journal.pone.0001511.t001

[5.4%], 34.68 [2.1%] ( $n = 6$ ) vs.  $I_f + KCR1 - \tau_{closed}$  values [ms]: 0.13 [48.3%], 0.92 [24.1%], 1.24 [17.9%], 5.76 [5.8%], 34.84 [3.9%] ( $n = 5$ ), Figure 6C and 6D). These results suggest that endogenous KCR1 already modulated open kinetics of native  $I_f$ .

### Suppression of endogenous KCR1 increases $I_f$ current density, single-channel activity of native $I_f$ and spontaneous beating rate

While alteration of  $I_f$  by KCR1 overexpression already indicated a direct interaction of HCN channels and KCR1 in native tissue, we further confirmed this finding by suppression of endogenous KCR1 using siRNA. Quantitative real-time PCR verified specific KCR1 knock-down by our siRNA in transfected CHO cells (normalized KCR1 mRNA: KCR1 100±0.09%; KCR1+pENTR/U6-KCR1<sup>siRNA</sup> 34.8±0.03%; KCR1+pENTR/U6-LacZ<sup>siRNA</sup> 91.1±0.08%) and neonatal cardiomyocytes (normalized KCR1 mRNA: control 100±0.07%; KCR1+pENTR/U6-KCR1<sup>siRNA</sup> 31.6±0.09%; KCR1+pENTR/U6-LacZ<sup>siRNA</sup> 96.5±0.1%). To evaluate the functional modulation of KCR1 knock-down we choose neonatal myocytes, because (i) these cells enable both analysis of KCR1-mediated effects on  $I_f$  current and spontaneous beating activity, and (ii) adult cardiomyocytes exhibit a high rate of dedifferentiation during culture for >48 h [22].

Compared to control conditions suppression of endogenous KCR1 significantly increased whole-cell  $I_f$  current density (6.09±0.6 pA/pF  $n = 11$ ;  $p = 0.04$  vs. control, Figure 5A, 5C and 5D). Moreover, KCR1 knock-down markedly increased the single-channel activity and altered the gating behavior of native  $I_f$  (Figure 7, Table 2). In contrast to KCR1 overexpression, KCR1 knock-down shifted the voltage of the half-maximal activation to more positive values (-44.5±0.9 mV,  $n = 15$ ;  $p < 0.05$  vs. control; slope factor  $k = -8.61 \pm 3.8$  mV;  $p = n.s.$  vs. control, Figure 7B). Consistent with our observations in experiments with enhanced and heterologous KCR1 expression, analyses of the multi-state gating revealed the

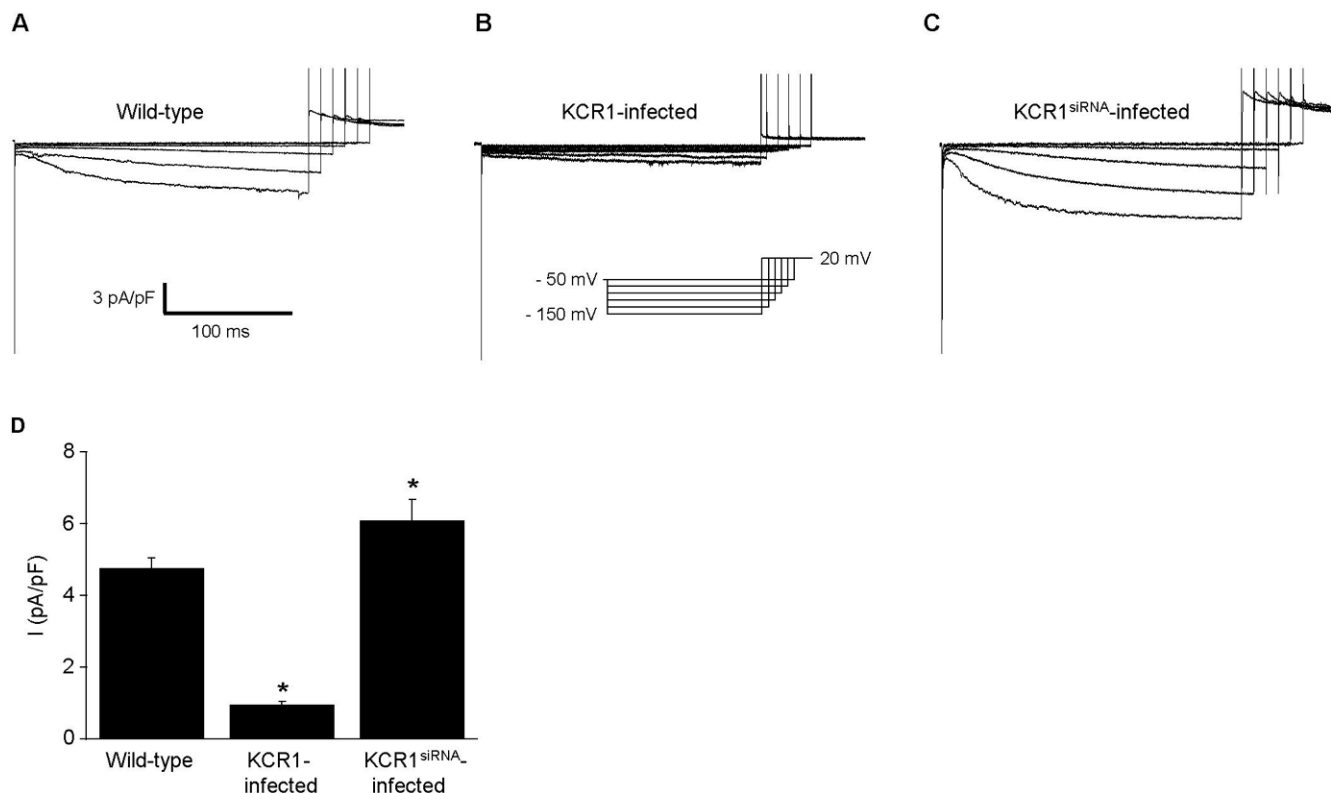

**Figure 5.** KCR1 reduces current size of native  $I_f$  in neonatal rat cardiomyocytes. (A–C) Original whole-cell recordings of  $I_f$  in neonatal rat cardiomyocytes: (A) control, (B) KCR1-infected and (C) KCR1<sup>siRNA</sup>-infected. (D) Mean current densities of  $I_f$  in neonatal cells show that KCR1 overexpression reduced  $I_f$ , while suppression of endogenous KCR1 by KCR1<sup>siRNA</sup> significantly increased native  $I_f$  (\*,  $p < 0.001$ ). For data see text. doi:10.1371/journal.pone.0001511.g005

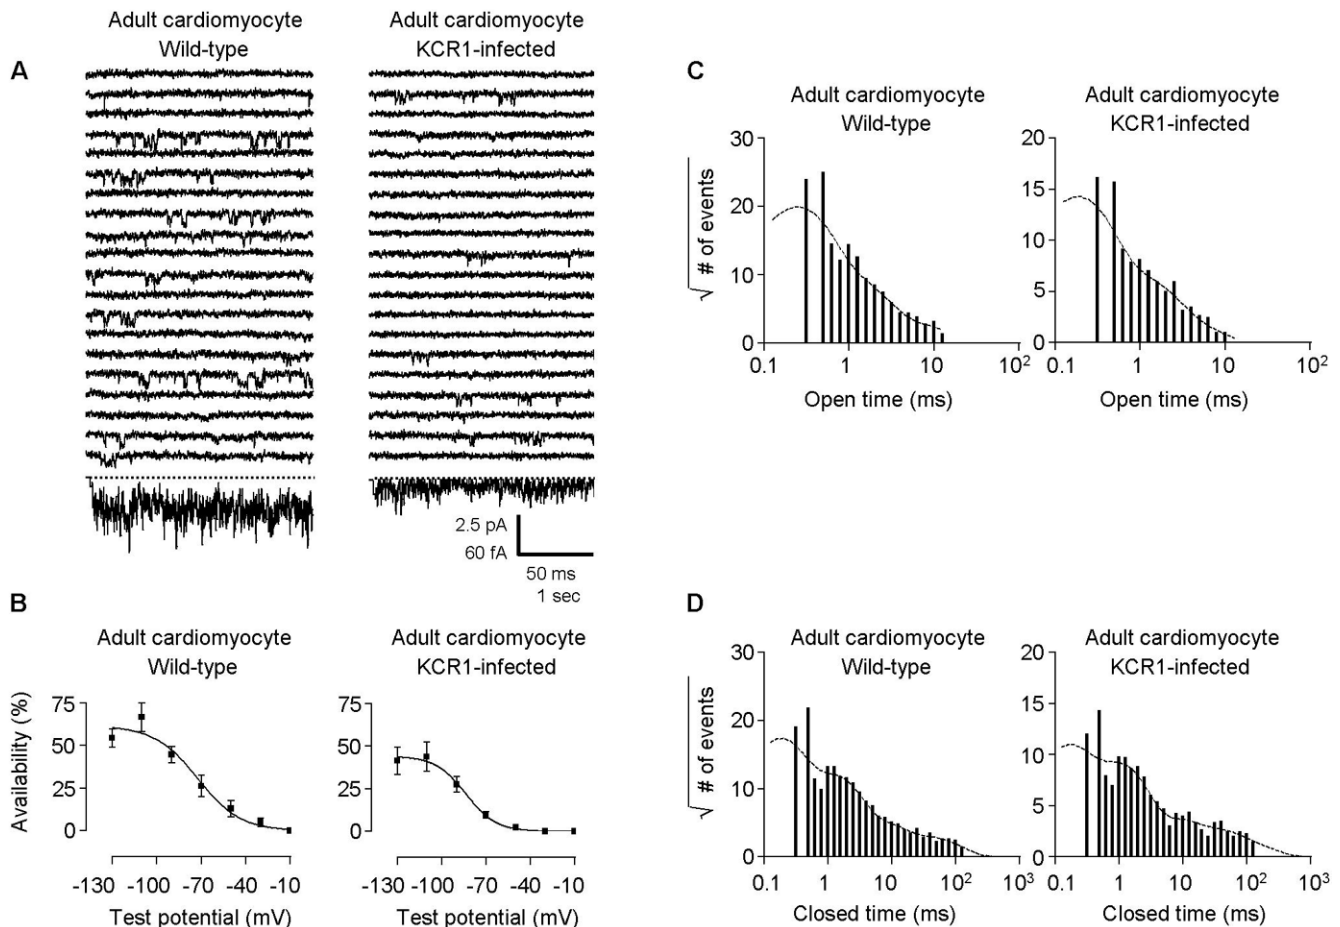

**Figure 6. Effect of KCR1 on single native  $I_f$  channel gating in one-channel patches.** (A) Comparison between single native  $I_f$  channels of control adult ventriculocytes (left) and KCR1-infected cells (right). Recording technique as in Figure 3. Scale bars, 50 ms, 2.5 pA for unitary current traces, and 1 s, 60 fA for ensemble average current. (B) KCR1 significantly shifted  $I_f$  activation to more negative potentials. Channel activation was measured by the parameter availability, plotted against the test potential and then determined by using the Boltzmann function. For data see text. (C) Open-time histograms: KCR1 exhibited no effect on the number of native  $I_f$  open states. Number of open events (square root) were plotted against the logarithmically binned open time durations for  $I_f$  alone and with exogenous KCR1 (pooled one- and multi [ $n \leq 3$ ]-channel experiments). (D) Closed-time histograms: KCR1 did not affect the number of native  $I_f$  closed states. Number of closed events (square root) were plotted against the logarithmically binned closed time durations for  $I_f$  alone and with exogenous KCR1 (pooled one-channel experiments only). doi:10.1371/journal.pone.0001511.g006

opposite effect by KCR1 knock-down on native  $I_f$ , i.e. an increase in the number of open states and a loss of one closed-state ( $\tau_{open}$  values of  $I_f$ -KCR1<sup>siRNA</sup> [ms]: 0.26 [46.4%], 1.19 [10.0%], 1.26 [25.7%], 3.21 [17.9%] ( $n = 9$ );  $\tau_{closed}$  values of  $I_f$ -KCR1<sup>siRNA</sup> [ms]: 0.10 [79.9%], 8.38 [20.1%] ( $n = 5$ ); Figure 7C and 7D).

To evaluate a possible functional modulation of KCR1 in spontaneously active tissue action potential recordings were performed in spontaneously beating neonatal cardiocytes. Control cultures beat spontaneously with a mean rate of  $80.4 \pm 5.8$  bpm ( $n = 17$ ). Cycle length tended to vary from beat to beat (Figure 8A). Maximal diastolic potential was  $-56.4 \pm 3.5$  mV. KCR1 overexpression entirely suppressed beating activity in neonatal cardiocytes ( $n = 20$ ; maximal diastolic potential  $-58.6 \pm 2.7$  mV;  $p = n.s.$  vs. control). Figure 8B illustrates a representative recording of an action potential that was induced artificially by a short depolarizing current pulse in a KCR1-infected myocyte. Conversely, knock-down of endogenous KCR1 by siRNA resulted in an acceleration of the beating rate to  $100.2 \pm 4.6$  bpm ( $n = 17$ ;  $p < 0.005$  vs. control; maximal diastolic potential  $-55.8 \pm 3.3$  mV;  $p = n.s.$  vs. controls, Figure 8C and 8D). This obvious inhibitory effect of KCR1 on action potential frequency further supports the

critical contribution of  $I_f$  to spontaneous beating activity of neonatal cardiocytes [4] and the modulating effect of KCR1 on native  $I_f$  and automaticity.

## DISCUSSION

In addition to the pore forming  $\alpha$ -subunit  $Na^+$ ,  $Ca^{2+}$  and  $K^+$  channels incorporate modulatory  $\beta$ -subunits, as well as scaffolding proteins, chaperones, cytoskeletal elements, and  $Ca^{2+}$ -sensing proteins in their higher order structures [23–25]. KCR1 is a membrane-associated protein with 12 putative transmembrane regions [13,14]. In the present study KCR1 expression was demonstrated in neonatal and adult ventriculocytes. By coimmunoprecipitation KCR1 was shown to form protein complexes with HCN2. KCR1 markedly altered  $I_{HCN}$  and  $I_f$  whole-cell currents, single-channel activity and gating, and suppressed spontaneous action potential activity, indicating a functional interaction with HCN channels.

Heterologously expressed HCN channels result in hyperpolarization-activated inward currents with similar, however, not identical properties compared to native  $I_f$  [8,9,12]. These observations suggest that HCN subunits are modulated by



**Table 2.** Single-channel parameters of native  $I_f$  in adult and neonatal cardiomyocytes modulated by KCR1 and KCR1<sup>siRNA</sup>

| Parameter               | Adult myocyte $I_f$ control | Adult myocyte $I_f$ KCR1-infected | Neonatal myocyte $I_f$ control | Neonatal myocyte $I_f$ KCR1-infected | Neonatal myocyte $I_f$ KCR1 <sup>siRNA</sup> -infected |
|-------------------------|-----------------------------|-----------------------------------|--------------------------------|--------------------------------------|--------------------------------------------------------|
| Open probability (%)    | 4.10±0.74                   | 0.94±0.24*                        | 9.12±1.72 <sup>#</sup>         | 4.05±1.09*                           | 16.3±3.24* <sup>#</sup>                                |
| Availability (%)        | 45.2±4.08                   | 21.8±2.97*                        | 41.2±8.46 <sup>#</sup>         | 20.4±5.11*                           | 50.2±7.55 <sup>#</sup>                                 |
| Mean open time (ms)     | 0.55±0.06                   | 0.56±0.05                         | 0.43±0.06                      | 0.40±0.05                            | 0.47±0.05                                              |
| Mean closed time (ms)   | 1.85±0.28                   | 2.22±0.10                         | 2.41±0.34                      | 3.94±0.65                            | 2.13±0.37 <sup>#</sup>                                 |
| Mean first latency (ms) | 53.9±6.80                   | 62.7±4.35                         | 40.5±5.51                      | 46.3±7.49                            | 28.6±4.22 <sup>#</sup>                                 |
| Amplitude (pA)          | -0.85±0.05                  | -0.59±0.02*                       | -0.86±0.02 <sup>#</sup>        | -0.59±0.02*                          | -1.23±0.11* <sup>#</sup>                               |
| Conductance (pS)        | 8.81±0.25                   | 6.10±0.26*                        | 7.01±0.49 <sup>#</sup>         | 4.27±0.31*                           | 13.6±0.94* <sup>#</sup>                                |
| $I_{peak}$ (fA)         | 70±9                        | 27±2*                             | 49±13                          | 23±7                                 | 102±27                                                 |
| number of experiments   | 10 (6)                      | 9 (5)                             | 12 (5)                         | 10 (6)                               | 9 (5)                                                  |

Modulation of single-channel parameters of native  $I_f$  (control) by KCR1 overexpression (KCR1-infected) and knock-down of endogenous KCR1 (KCR1<sup>siRNA</sup>-infected) in adult and neonatal cardiomyocytes. Holding potential -35 mV, test potential -90 mV.  $I_{peak}$  was measured from ensemble average currents. For closed time and latency analysis, only experiments containing just one detected open level were used for calculation. Numbers of experiments given in parentheses indicate number of experiments with only one channel in the patch. Pooled data are presented as mean±SEM.

\* $p$ <0.05 vs. control;

<sup>#</sup> $p$ <0.05 vs. KCR1-infected.

doi:10.1371/journal.pone.0001511.t002

additional  $\beta$ -subunits and regulatory proteins in native tissue. Recent studies demonstrated that HCN channels associate with several modulating proteins [26–31]. KCNE2 enhances the expression and accelerates activation of  $I_{HCN}$  [26–28]. Filamin A modifies HCN1, but not HCN2 or HCN4 channel activity and distribution on the cell membrane [29]. Moreover, TPR-containing Rab8b interacting protein [30], tamalin, S-SCAM and Mint2 scaffold proteins [31] were reported to affect HCN trafficking and, thus,  $I_{HCN}$  current density. However, since these effects are not sufficient to explain  $I_f$  properties in native tissue, it is likely that HCN currents are being modulated by one or more additional proteins.

Using immunoprecipitation studies we now show that KCR1 and HCN2 proteins associate. It is well known that regulatory proteins can affect both expression and gating of pore forming  $\alpha$ -subunits. Suppression of recombinant HCN2 single-channel activity by KCR1 clearly demonstrated a functional effect of KCR1 on HCN channel behavior. More importantly, knock-down of endogenous KCR1 also profoundly modulated native  $I_f$  function in ventricular cells. Loss of KCR1 lead to (i) an increase of  $I_f$  current density, (ii) a higher activation of  $I_f$  on single-channel level, and (iii) a significant elevation of the spontaneous beating rate.

Currently, two distinct ranges of single channel conductances for native  $I_f$  and cloned HCN channels have been reported depending on the recording technique (low conductance currents of 1–1.5 pS using a corner frequency of 80–800 Hz [17,18,20] vs. an approximately 10-fold higher conductance using a filtering of 2000 Hz [16,19]), as has been discussed previously [32]. In the present study we further confirmed that current openings in our recordings indeed were produced by HCN channels as we demonstrated (i) a typical increase of channel activity by the application of cAMP to the inner side of inside-out patches, and (ii) a characteristic channel inhibition by the  $I_f$ /HCN specific blocker ivabradine. Moreover, we could clearly show time- and voltage-dependence of HCN single-channel recordings obtained from multi-channel patches which were comparable to macroscopic  $I_f$ / $I_{HCN}$  currents. Given the evidence for cooperative gating between single HCN channels [20], expectedly, the sum of recordings from one-channel patches in the present study and in our previous report [16] did not result in average currents with identical kinetics compared to macroscopic  $I_f$ / $I_{HCN}$ , emphasising that for the evaluation of  $I_f$ / $I_{HCN}$

averages it is essential to distinguish between recordings obtained from patches with one individual channel vs. multi-channel patches.

While differences of  $I_f$ / $I_{HCN}$  conductance in part might be caused by distinct recording techniques or by the expression of different HCN channel isoforms, it might also indicate HCN modulation by endogenous KCR1 within native channel complexes. Notably, in the present study single-channel parameters of native  $I_f$  more closely resembled those of HCN2+KCR1 than HCN2 alone (Table 1 and 2), like for instance single-channel conductance in ventricular cells (7–9 pS). A similar single-channel conductance (7–10 pS) has been reported for recordings of  $I_f$  in neurons [19,33], which also express KCR1 [13], supporting the hypothesis of potential  $I_f$  modulation by KCR1 in native tissue. Beside single-channel conductance a possible interaction of endogenous KCR1 and HCN was especially evident for single-channel open kinetics. While four open states could be obtained for HCN2 alone in heterologous expression, KCR1 reduced HCN2 open kinetics to only three states, which was however similar to native  $I_f$ . Consistent with this notion, knock-down of endogenous KCR1 increased kinetics of native  $I_f$  to four open states and increased single-channel conductance. These observations further indicate that KCR1 functionally interacts with native  $I_f$  in cardiac tissue.

Interestingly, KCR1 overexpression shifted the voltage-dependence of  $I_f$  activation to more negative potentials, whereas KCR1 knock-down resulted in a shift of the half-maximal activation to more positive values. Low expression levels of KCR1 in sinus node cells might contribute to larger  $I_f$  current size and more positive voltages of mid-activation of  $I_f$ , whereas higher expression of KCR1 in the atrioventricular node and working myocardium could explain much smaller  $I_f$  currents and the more negative threshold potentials of  $I_f$  activation in these regions. However, it should always be acknowledged that (i) the regional distribution of HCN channel isoforms (e.g. HCN4 as the predominant isoform in sinoatrial node region), (ii) the variety of heteromultimerization, and (iii) the influence of other known/unknown modulating proteins together determine the biophysical behavior of native  $I_f$ . This might explain why single channel conductance of native  $I_f$  in sinoatrial node cells was not reported to be higher than in working myocardium or neurons [16,17,19,33].

KCR1 inhibited single-channel activity and seemed to keep HCN channels in a deeper closed-state indicating a functional



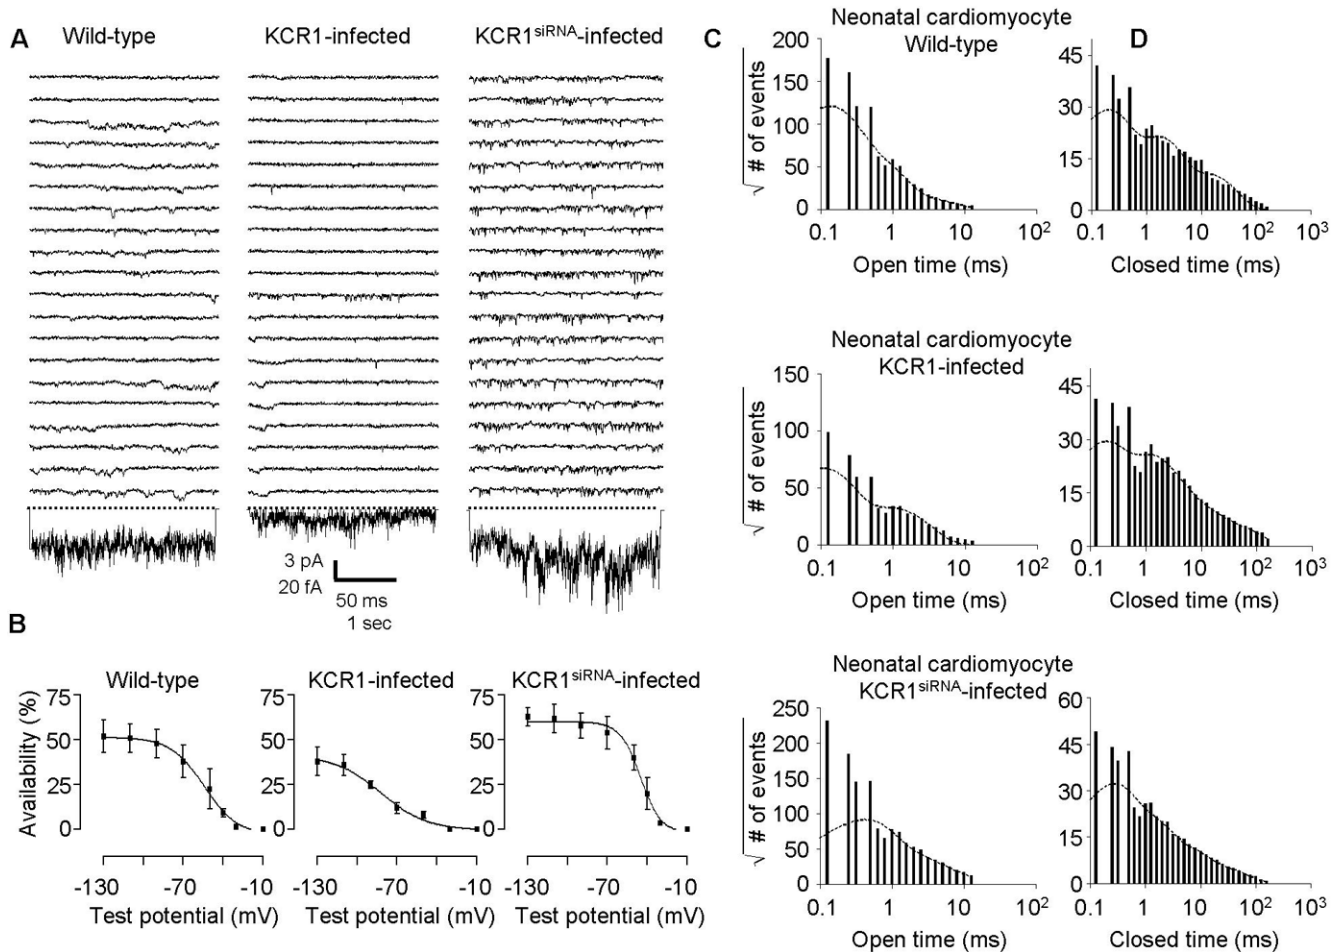

**Figure 7. Effect of KCR1 and KCR1<sup>siRNA</sup> on single native  $I_f$  channel gating in one-channel patches.** (A) Comparison between single native  $I_f$  channels of control neonatal ventriculocytes (left), KCR1-infected (middle) and KCR1<sup>siRNA</sup>-infected cells (right). Recording technique as in Figure 3. Scale bars, 50 ms, 3 pA for unitary current traces, and 1 s, 20 fA for ensemble average current. (B) Enhanced expression and knock-down of KCR1 significantly shifted the half-maximal activation of  $I_f$  to more negative and more positive potentials, respectively. Channel activation was measured by the parameter availability, plotted against the test potential and then determined by using the Boltzmann function. For data see text. (C) Open-time histograms: KCR1 exhibited no effect on the number of native  $I_f$  open states, whereas KCR1<sup>siRNA</sup> induced an increase of the number of open states. Number of open events (square root) were plotted against the logarithmically binned open time durations for  $I_f$  alone and with exogenous KCR1 or KCR1<sup>siRNA</sup> (pooled one- and multi [ $n \geq 3$ ]-channel experiments). (D) Closed-time histograms: KCR1 did not affect the number of native  $I_f$  closed states, while KCR1 knock-down resulted in a loss of one closed state. Number of closed events (square root) were plotted against the logarithmically binned closed time durations for  $I_f$  alone and with exogenous KCR1 or KCR1<sup>siRNA</sup> (pooled one-channel experiments only). doi:10.1371/journal.pone.0001511.g007

alteration of HCN channel subunits as underlying mechanism of KCR1-mediated modulation of  $I_f$  and cardiac automaticity. Further potential KCR1-induced regulatory mechanisms might involve alteration of HCN trafficking and cell-surface stability. Although such effects could not explain the changes of  $I_f$  single-channel gating, they might contribute to the observed KCR1-mediated actions and will be addressed in future studies.

KCR1 significantly suppressed spontaneous beating activity of neonatal cardiocytes, implying that KCR1 contributes to modulation of the spontaneous activity in cardiac cells. Interestingly, both KCNE2 and KCR1 originally were identified as potential regulatory subunits of HERG, the pore forming  $\alpha$ -subunit of  $I_{Kr}$  [14,34]. These and our observations suggest, that both proteins may have a prominent role for the balance of inward ( $I_f$ ) and outward ( $I_{Kr}$ ) currents involved in cardiac pacemaker activity.

Given these obvious inhibitory effects of KCR1 on HCN channels and native  $I_f$ , alterations of KCR1 expression might

cause changes in heart rate or ectopic spontaneous depolarizations in patients, though our *in-vitro* observations cannot readily be generalized to humans *in-vivo*. Interacting proteins like KCR1 inhibiting  $I_f$  and, thus, depressing spontaneous activity may provide a novel therapeutic target of cardiac arrhythmias.

## MATERIALS AND METHODS

### Plasmids, Small Interfering RNA and Adenovirus Preparation

The expression plasmids pAdCGI-HCN2 encoding the full-length sequence of mHCN2, pCGI-Kv1.3A<sub>Y</sub>A and pAdCGI have been described [4,35]. The full-length coding sequence of rat KCR1 (kindly provided by Dr. H. Higashida, Kanazawa University, Japan) was cloned into the multiple cloning site of pAdCGI, to give pAdCGI-KCR1. The red fluorescent protein coding sequence (Red) of psDRed-Express-1 (Clontech, Palo Alto, CA) was cloned

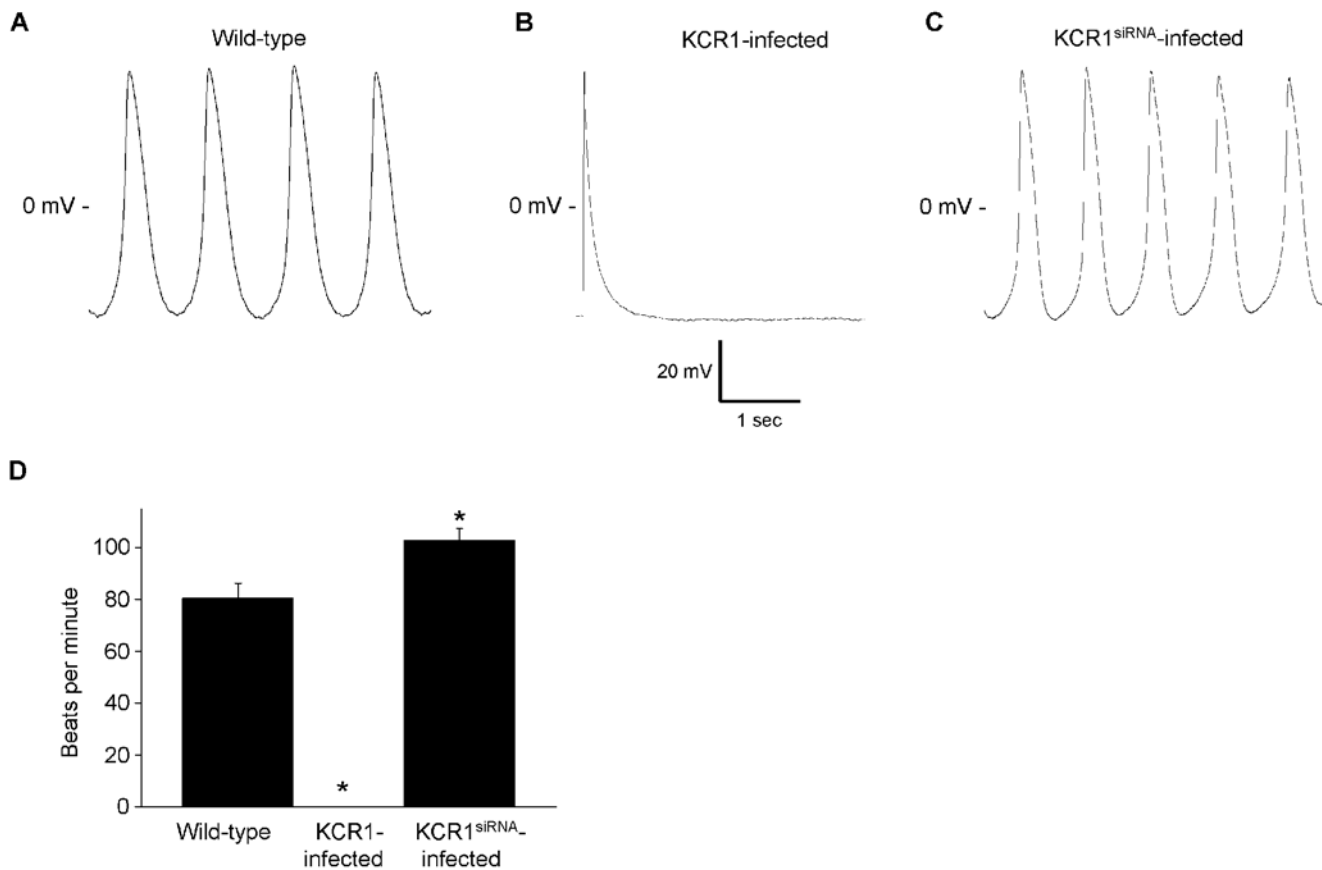

**Figure 8. KCR1 suppresses spontaneous action potential activity.** (A) Representative original recordings of spontaneous action potentials of control neonatal rat ventricular cardiomyocytes. (B) KCR1 infection suppressed spontaneous beating activity in neonatal cells. Action potential artificially induced by a depolarizing pulse in a quiescent neonatal cardiocyte. (C) KCR1<sup>siRNA</sup> infection accelerated spontaneous beating activity in neonatal cells. (D) Overexpression and knock-down of endogenous KCR1 resulted in a significant (\*,  $p < 0.001$ ) decrease and increase of the beating rate, respectively. For data see text.

doi:10.1371/journal.pone.0001511.g008

into pAdCGI-HCN2 in place of the EGFP sequence, to generate pAdCRI-HCN2. For immunoprecipitation studies, the rat KCR1 sequence was ligated in frame at the N-terminus to the three FLAG epitopes of vector p3xFLAG-CMV7.1 (Sigma GmbH, Munich), resulting in the plasmid pCFLAG<sup>3</sup>-KCR1.

The small interfering RNA (siRNA) nucleotide sequences for rat KCR1 (Accession no. GI 3513450) and control LacZ were as follows: 5'-GGAAACGTAGAGTTCAGTTCTC-3' and 5'-CTACACAA-ATCAGCGATTT-3' (Invitrogen), respectively. For transient transfection experiments the DNA oligonucleotides were cloned into pENTR/U6 (Invitrogen) to give pENTR/U6-KCR1<sup>siRNA</sup> and pENTR/U6-LacZ<sup>siRNA</sup>, respectively, and for adenovirus generation into pAdHCRed to give pAdHCRed-KCR1<sup>siRNA</sup>. Adenovirus vectors were generated by Cre-lox recombination of purified  $\psi$ 5 viral DNA and shuttle vector DNA as previously described [4,35,36].

### Transient Transfections

CHO-K1 cells (ATCC, American Type Culture Collection, Manassas, VA) were transfected with 1  $\mu$ g/well plasmid DNA (as indicated) using Lipofectamine Plus (Life Technologies, Gaithersburg, MD) as directed by the manufacturer [37,38]. Three days posttransfection, electrophysiological recordings, RNA isolation and immunoprecipitations from whole cell protein extracts were performed.

### Rat Cardiomyocyte Isolation and Primary Culture

Animal experiments were performed in accordance with institutional guidelines for animal use in research. Ventricular myocytes of adult rats (Sprague-Dawley, 200 to 300 g) were isolated using Langendorff apparatus as previously described [39,40]. Neonatal cardiomyocytes of Sprague-Dawley (1–2 days old) rats were enzymatically dissociated as previously described [4]. Action potential studies were conducted on 4- to 6-day-old monolayer cultures. For whole-cell patch-clamp experiments, 3- to 5-day-old monolayer cultures were dispersed by trypsin, and re-plated at a low density to study electrically isolated cells within 2 to 8 hours [4].

### Adenovirus Infection

Infection of adult and neonatal myocytes was performed 2 h and 1–3 days after plating, respectively, at a multiplicity of infection (MOI) of 15 to 100 p.f.u. per cell.

### Immunoprecipitation

Whole protein extracts were prepared by lysing the cells in washing buffer containing 50 mM Tris (pH 7.4), 150 mM NaCl, 0.25% Triton X-100, and 5 mM NaF, supplemented with the mammalian protease inhibitors Aprotinin (Sigma). Extracts were then passed through a needle 15 times, followed by high-speed

centrifugation to sediment cellular debris. 700  $\mu$ g of each extract were immunoprecipitated with protein A-Sepharose-linked anti-FLAG-M2 antibodies (Sigma). A set of identical control experiments was performed using beads not linked to antibody (normal A-Sepharose, Sigma). Immunoprecipitates were washed three times with lysis buffer followed by resuspension in SDS sample buffer (0.23 M Tris, pH 6.4, 10% glycerol, 0.33% SDS, 3.3 mM DTT), sonication, and electrophoresis on a 7.5% SDS-PAGE. The gel was transferred to Hybond ECL membrane (Amersham) for Western blotting with an anti-HCN2 antibody (Alomone Labs, Israel).

### Single-cell RT-PCR analysis

cDNA synthesis and PCR reaction from two to three isolated single cells were performed using the OneStep RT-PCR Kit (QIAGEN, Hilden, Germany) as directed by the manufacturer with sense- and antisense primer specific for KCR1 (sense: 5'-GAC GAG ATC TTC CAC CTG C-3'; antisense: 5'-TAG AAG TTG CCA ACA CTG AAG-3'; amplifying 218 base pairs and spanning one intron) and GAPDH (sense: 5'-GGT CGG TGT GAA CGG ATT TG-3'; antisense: 5'-GTG AGC CCC AGC CTT CTC CAT-3'; amplifying 318 base pairs). Amplification was performed in a Thermocycler gradient (Eppendorf, Hamburg, Germany), starting with 95°C for 15 minutes to deactivate the Reverse Transcriptase and activate the Taq polymerase. The program consisted of 50 cycles (Denaturation: 95°C for 30 seconds; Annealing: 59 $\pm$ 3°C gradient for 45 seconds; Elongation: 72°C for 1 minute) with a final elongation step at 72°C for 10 minutes. Samples were analyzed on 1.5% agarose gels, stained with ethidium bromide and documented on a BioDocAnalyze 2.0 (Biomtra, Göttingen, Germany).

### Preparation of sinus and atrioventricular node

Fresh hearts from adult rats (Sprague-Dawley, 200 to 300 g) and adult pigs (freshly received from slaughterhouse) were dissected. To locate the sinoatrial node we used three intersection lines: the sulcus terminalis, the lateral border of the superior vena cava, and the superior border of the superior vena cava or the right auricle. The atrioventricular node was prepared according to the anatomic landmarks of the triangle of Koch in the right atrium: the coronary sinus ostium, the membranous septum, and the septal/posterior commissure of the tricuspid valve. Finally the left and right atria, left and right ventricular free wall and ventricular septum were dissected. RNA was directly isolated from these fresh samples.

### RNA isolation and Quantitative Real-time PCR

Total RNA was extracted from neonatal rat cardiomyocytes, and from cardiac tissue of adult rat and pig using the RNeasy kit (Qiagen), and first strand cDNA was reverse transcribed with Omniscript Reverse Transcription Kit (Qiagen) as described previously [41]. Quantitative real-time PCR was performed on a LightCycler<sup>TM</sup> 2.0 instrument using FastStart DNA Master<sup>Plus</sup> SYBR Green I (Roche Diagnostics). Gene-specific primers were the following: KCR 1 for rat samples: forward-primer: 5'-TTC AGG AAG ATA CAG CCC AGA-3', backward-primer: 5'-GGG TTG GAA ATA CTG CTA GGG-3'; KCR1 for pig samples: forward-primer: 5'-GAC GAG ATC TTC CAC CTG C-3', backward-primer: 5'-TAG AAG TTG CCA ACA CTG AAG-3'. GAPDH (glyceraldehyde-3-phosphate dehydrogenase) and SDHA (succinate dehydrogenase complex, subunit A, flavoprotein) expression of each sample were used as endogenous controls (GAPDH - primers: 5'-GGT CGG TGT GAA CGG ATT TG-3' and 5'-GTG AGC CCC AGC CTT CTC CAT-3', GenBank accession No. NM\_017008; SDHA-primers: 5'-TGG GAA CAA

GAG GGC ATC TG-3' and 5'-CCA CCA CTG CAT CAA ATT CAT G-3', GenBank accession No. NM\_130428) [42]. Quantitative real-time PCR was carried out under the following cycling conditions: stage 1, 95°C for 10 minutes (rep 1); stage 2, 95°C for 10 s, 61°C for 5 s, and 72°C for 10s (rep 38). Analysis of the PCR curves was performed with the second derivative maximum method of the LightCycler software [41,43,44]. All sample measurements were repeated at least three times and results are given as mean $\pm$ SEM.

### Electrophysiology and Data Analysis

Experiments were carried out using standard microelectrode whole-cell and cell-attached patch-clamp techniques with an Axopatch 200B amplifier and Digidata 1200 interface (Axon instruments, Foster City, CA, USA) at room temperature (21 to 23°C) [35,45,46]. Whole-cell and single-channel recordings were done as previously described, if not otherwise indicated [4,16,41,47]. For inside-out recordings both the pipette and bath solution were composed of (mM): KCl 160 mM, MgCl<sub>2</sub> 1 mM, HEPES 10 mM, EGTA 1 mM; pH 7.4 with KOH. In some experiments 8-bromo-adenosine 3',5'-cyclic monophosphate (8Br-cAMP, 1 mM) (Sigma) or ivabradine (50  $\mu$ M; kindly provided by the Institut de Recherches Servier, Suresnes, France) were added to the bath solution, as indicated. In KCR1-infected myocytes action potentials were initiated by short depolarizing current pulses (2 ms, 500–800 pA).

Single-channel analysis were done using custom software as previously reported [16,45,47]. Linear leak and capacity currents were digitally subtracted using the average currents of non-active sweeps. For detailed gating analysis idealized currents were analyzed in 150 ms steps recorded at continuous pulse mode (total recording 20 $\times$ 150 ms). Closed-time and first-latency analyzes were carried out only in one-channel patches. The open probability (defined as the relative occupancy of the open state during active sweeps), the availability (fraction of sweeps containing at least one channel opening), and  $I_{\text{peak}}$  (the peak ensemble average current, obtained visually) were calculated from single-channel and multi-channel patches with a maximum of three active channels in one patch. Single-channel amplitudes were determined by direct measurements of fully resolved openings (conductance-calculation) or as the maximum of Gaussian fits on amplitude histograms.  $n$ , the number of the channels in the patch, was defined as the maximum current amplitude observed, divided by the unitary current. Peak current was corrected by division through  $n$ . The availability was corrected by the square root method:  $(1-\text{availability}_{\text{corrected}})$  is the  $n^{\text{th}}$  root of  $(1-\text{availability}_{\text{uncorrected}})$ . The corrected open probability was calculated on the basis of the corrected number of active sweeps, i.e. total open time divided by  $(n \times \text{availability}_{\text{corrected}} \times \text{number of test pulses} \times \text{pulse length})$ . Time constants of open time ( $\tau_{\text{open}}$ ) and closed time histograms ( $\tau_{\text{closed}}$ ) were obtained by multi-exponential maximum likelihood estimates (MLE) on open and closed time distributions (shown here as logarithmic binned histograms from pooled data) is given by the “best fit” method [21]. Comparison of gating kinetics was performed as previously described [16].

The availability or fractions of active sweeps were used for calculation of voltage-dependent activation. The voltage-dependence of activation was analyzed using the Boltzmann function:  $Y = Y_{\text{max}} / \{1 + e^{-(V - V_{0.5})/k}\}$ , where  $V_{0.5}$  is the voltage of half-maximal activation and  $k$  is the slope factor [45]. Pooled data are presented as mean $\pm$ SEM. An unpaired two-tailed  $t$  test was used for statistical examinations. Probability values of  $P < 0.05$  were deemed significant. One-way ANOVA was calculated for multiple comparisons and considered significant for  $P < 0.05$ .

## ACKNOWLEDGMENTS

We thank N. Henn and Iris Berg for skillful technical assistance, and Mr. Harbig for providing fresh hearts from adult pigs.

## REFERENCES

- Pape HC (1996) Queer current and pacemaker: the hyperpolarization-activated cation current in neurons. *Annu Rev Physiol* 58: 299–327.
- DiFrancesco D (1993) Pacemaker mechanisms in cardiac tissue. *Annu Rev Physiol* 55: 455–72.
- Hoppe UC, Jansen E, Südkamp M, Beuckelmann DJ (1998) A hyperpolarization-activated inward current (I<sub>h</sub>) in ventricular myocytes from normal and failing human hearts. *Circulation* 97: 55–65.
- Er F, Larbig R, Ludwig A, Biel M, Hofmann F, et al. (2003) Dominant-negative suppression of HCN channels markedly reduces the native pacemaker current I<sub>f</sub> and undermines spontaneous beating of neonatal cardiomyocytes. *Circulation* 107: 485–9.
- Stieber J, Herrmann S, Feil S, Loster J, Feil R, et al. (2003) The hyperpolarization-activated channel HCN4 is required for the generation of pacemaker action potentials in the embryonic heart. *Proc Natl Acad Sci U S A* 100: 15235–40.
- Tu H, Deng L, Sun Q, Yao L, Han JS, et al. (2004) Hyperpolarization-activated, cyclic nucleotide-gated cation channels: roles in the differential electrophysiological properties of rat primary afferent neurons. *J Neurosci Res* 76: 713–722.
- Vasilyev DV, Barish ME (2002) Postnatal development of the hyperpolarization-activated excitatory current I<sub>h</sub> in mouse hippocampal pyramidal neurons. *J Neurosci* 22: 8992–9004.
- Ludwig A, Zong X, Jeglitsch M, Hofmann F, Biel M (1998) A family of hyperpolarization-activated mammalian cation channels. *Nature* 393: 587–91.
- Santoro B, Liu DT, Yao H, Bartsch D, Kandel ER, et al. (1998) Identification of a gene encoding a hyperpolarization-activated pacemaker channel of brain. *Cell* 93: 717–29.
- Ishii TM, Takano M, Xie LH, Noma A, Ohmori H (1999) Molecular characterization of the hyperpolarization-activated cation channel in rabbit heart sinoatrial node. *J Biol Chem* 274: 12835–9.
- Seifert R, Scholten A, Gauss R, Mincheva A, Lichter P, et al. (1999) Molecular characterization of a slowly gating human hyperpolarization-activated channel predominantly expressed in thalamus, heart, and testis. *Proc Natl Acad Sci U S A* 96: 9391–9396.
- Gauss R, Seifert R, Kaupp UB (1998) Molecular identification of a hyperpolarization-activated channel in sea urchin sperm. *Nature* 393: 583–7.
- Hoshi N, Takahashi H, Shahidullah M, Yokoyama S, Higashida H (1998) KCR1, a membrane protein that facilitates functional expression of non-inactivating K<sup>+</sup> currents associates with rat EAG voltage-dependent K<sup>+</sup> channels. *J Biol Chem* 273: 23080–5.
- Kupersmidt S, Yang IC, Hayashi K, Wei J, Chanthaphaychith S, et al. (2003) The IKr drug response is modulated by KCR1 in transfected cardiac and noncardiac cell lines. *Faseb J* 17: 2263–5.
- Nakajima T, Hayashi K, Viswanathan PC, Kim MY, Anghelescu M, et al. (2007) HERG is protected from pharmacological block by constitutive alpha-1,2-glucosyltransferase function. *J Biol Chem* 282: 5506–13.
- Michels G, Er F, Khan IF, Südkamp M, Herzog S, et al. (2005) Single-channel properties support a potential contribution of HCN channels and I<sub>f</sub> to cardiac arrhythmias. *Circulation* 111: 399–404.
- DiFrancesco D (1986) Characterization of single pacemaker channels in cardiac sino-atrial node cells. *Nature* 324: 470–473.
- DiFrancesco D, Mangoni M (1994) Modulation of single hyperpolarization-activated channels (i<sub>f</sub>) by cAMP in the rabbit sino-atrial node. *J Physiol Lond* 474: 473–482.
- Simeone TA, Rho JM, Baram TZ (2005) Single channel properties of hyperpolarization-activated cation currents in acutely dissociated rat hippocampal neurones. *J Physiol* 568: 371–80.
- Dekker JP, Yellen G (2006) Cooperative gating between single HCN pacemaker channels. *J Gen Physiol* 128: 561–7.
- Horn R (1987) Statistical methods for model discrimination. Applications to gating kinetics and permeation of the acetylcholine receptor channel. *Biophys J* 51: 255–63.
- Bugaisky LB, Zak R (1989) Differentiation of adult rat cardiac myocytes in cell culture. *Circ Res* 64: 493–500.
- An WF, Bowlby MR, Betty M, Cao J, Ling HP, et al. (2000) Modulation of A-type potassium channels by a family of calcium sensors. *Nature* 403: 553–6.
- Wible BA, Yang Q, Kuryshv YA, Accili EA, Brown AM (1998) Cloning and expression of a novel K<sup>+</sup> channel regulatory protein, KChAP. *J Biol Chem* 273: 11745–51.
- Kagan A, Melman YF, Krumerman A, McDonald TV (2002) 14-3-3 amplifies and prolongs adrenergic stimulation of HERG K<sup>+</sup> channel activity. *Embo J* 21: 1889–98.
- Decher N, Bundis F, Vajna R, Steinmeyer K (2003) KCNE2 modulates current amplitudes and activation kinetics of HCN4: influence of KCNE family members on HCN4 currents. *Pflügers Arch* 446: 633–40.
- Qu J, Kryukova Y, Potapova IA, Doronin SV, Larsen M, et al. (2004) MiRP1 modulates HCN2 channel expression and gating in cardiac myocytes. *J Biol Chem* 279: 43497–502.
- Yu H, Wu J, Potapova I, Wymore RT, Holmes B, et al. (2001) MinK-related peptide 1: A beta subunit for the HCN ion channel subunit family enhances expression and speeds activation. *Circ Res* 88: E84–7.
- Gravante B, Barbuti A, Milanesi R, Zappi I, Viscomi C, et al. (2004) Interaction of the pacemaker channel HCN1 with filamin A. *J Biol Chem* 279: 43847–53.
- Santoro B, Wainger BJ, Siegelbaum SA (2004) Regulation of HCN channel surface expression by a novel C-terminal protein-protein interaction. *J Neurosci* 24: 10750–62.
- Kimura K, Kitano J, Nakajima Y, Nakanishi S (2004) Hyperpolarization-activated, cyclic nucleotide-gated HCN2 cation channel forms a protein assembly with multiple neuronal scaffold proteins in distinct modes of protein-protein interaction. *Genes Cells* 9: 631–40.
- DiFrancesco D (2005) Letter regarding article by Michels et al, “Single-channel properties support a potential contribution of hyperpolarization-activated cyclic nucleotide-gated channels and I<sub>f</sub> to cardiac arrhythmias”. *Circulation* 112: e72; author reply: e72-3.
- Kole MH, Hallermann S, Stuart GJ (2006) Single I<sub>h</sub> channels in pyramidal neuron dendrites: properties, distribution, and impact on action potential output. *J Neurosci* 26: 1677–87.
- Abbott GW, Sesti F, Splawski I, Buck ME, Lehmann MH, et al. (1999) MiRP1 forms IKr potassium channels with HERG and is associated with cardiac arrhythmia. *Cell* 97: 175–87.
- Hoppe UC, Marbán E, Johns DC (2001) Distinct gene-specific mechanisms of arrhythmia revealed by cardiac gene transfer of two long QT disease genes, HERG and KCNE1. *Proc Natl Acad Sci U S A* 98: 5335–40.
- Hardy S, Kitamura M, Harris-Stansil T, Dai Y, Phipps ML (1997) Construction of adenovirus vectors through Cre-lox recombination. *J Virol* 71: 1842–9.
- Lam JS, Huang H, Levitz SM (2007) Effect of Differential N-linked and O-linked Mannosylation on Recognition of Fungal Antigens by Dendritic Cells. *PLoS ONE* 2: e1009.
- Fowler MA, Sidropoulou K, Ozkan ED, Phillips CW, Cooper DC (2007) Corticolimbic expression of TRPC4 and TRPC5 channels in the rodent brain. *PLoS ONE* 2: e573.
- Hoppe UC, Marbán E, Johns DC (2000) Molecular dissection of cardiac repolarization by *in vivo* Kv4.3 gene transfer. *J Clin Invest* 105: 1077–1084.
- Hoppe UC, Johns DC, Marban E, O'Rourke B (1999) Manipulation of cellular excitability by cell fusion: effects of rapid introduction of transient outward K<sup>+</sup> current on the guinea pig action potential. *Circ Res* 84: 964–72.
- Michels G, Er F, Eicks M, Herzog S, Hoppe UC (2006) Long-term and immediate effect of testosterone on single T-type calcium channel in neonatal rat cardiomyocytes. *Endocrinology* 147: 5160–9.
- Fischer M, Skowron M, Berthold F (2005) Reliable transcript quantification by real-time reverse transcriptase-polymerase chain reaction in primary neuroblastoma using normalization to averaged expression levels of the control genes HPRT1 and SDHA. *J Mol Diagn* 7: 89–96.
- Riessland M, Brichta L, Hahnen E, Wirth B (2006) The benzamide M344, a novel histone deacetylase inhibitor, significantly increases LMN2 RNA/protein levels in spinal muscular atrophy cells. *Hum Genet* 120: 101–10.
- Chu SH, Sutherland K, Beck J, Kowalski J, Goldspink P, et al. (2005) Sex differences in expression of calcium-handling proteins and beta-adrenergic receptors in rat heart ventricle. *Life Sci* 76: 2735–49.
- Michels G, Matthes J, Handrock R, Kuchinke U, Groner F, et al. (2002) Single-channel pharmacology of mibefradil in human native T-type and recombinant Ca<sub>v</sub>3.2 calcium channels. *Mol Pharmacol* 61: 682–94.
- Hullin R, Matthes J, von Vietinghoff S, Bodi I, Rubio M, et al. (2007) Increased expression of the auxiliary beta2-subunit of ventricular L-type Ca<sub>v</sub>2+ channels leads to single-channel activity characteristic of heart failure. *PLoS ONE* 2: e292.
- Er F, Michels G, Gassanov N, Rivero F, Hoppe UC (2004) Testosterone induces cytoprotection by activating ATP-sensitive K<sup>+</sup> channels in the cardiac mitochondrial inner membrane. *Circulation* 110: 3100–7.

## Author Contributions

Conceived and designed the experiments: UH GM. Performed the experiments: GM FE IK MB NG JE. Analyzed the data: GM. Contributed reagents/materials/analysis tools: DJ. Wrote the paper: UH GM.
